# Supplementary material
Source: HighWire-hosted journal article supplement (doi:10.1101/rna.030015.111)
Supplement: SuppTables.docx [file SuppTables.docx]

**SUPPLEMENTARY TABLES**

**TABLE 1.** Sequences shRNAs

| shRNA | Top sequence |
| --- | --- |
| Pten-1 | CACAATCTATGTGCTGAGAGACTAGTGAAGCCACAGATGTAGTCTCTCAGCACATAGATTGTA |
| Pten-2 | AACAATGAACCTGATCATTATATAGTGAAGCCACAGATGTATATAATGATCAGGTTCATTGTC |
| Pten-3 | CTCTGTGAAGATCTTGACCAATTAGTGAAGCCACAGATGTAATTGGTCAAGATCTTCACAGAA |
| Pten-4 | CCGACTTAGACTTGACCTATATTAGTGAAGCCACAGATGTAATATAGGTCAAGTCTAAGTCGA |
| p16-1 | CGCAGCTCTTCTGCTCAACTACTAGTGAAGCCACAGATGTAGTAGTTGAGCAGAAGAGCTGCT |
| p16-2 | ATTGGTCACTGTGAGGATTCAGTAGTGAAGCCACAGATGTACTGAATCCTCACAGTGACCAAG |
| p16-3 | AGCTCTGGCTTTCGTGAACATGTAGTGAAGCCACAGATGTACATGTTCACGAAAGCCAGAGCG |

**TABLE 2.** Sequences siRNAs

| siRNA | Top sequence | Bottum sequence |
| --- | --- | --- |
| PDGFRα | rGrGrA rUrUrC rUrArC rUrUrU rCrUrA rCrArA rUrArA rGrAT C | rGrArU rCrUrU rArUrU rGrUrA rGrArA rArGrU rArGrA rArUrC rCrArC |
| Pten-A | rUrGrAr UrArU rCrArA rArGrU rArGrAr GrUrU rCrUrU rCrCA C | rGrUrG rGrArA rGrArA rCrUrC rUrArC rUrUrU rGrArU rArUrC rArCrC |
| Pten-1 | rGrGrU rGrUrA rUrArC rArGrG rArArC rArArU rArUrU rGrAT G | rCrArU rCrArA rUrArU rUrGrU rUrCrC rUrGrU rArUrA rCrArC rCrUrU |
| Pten-2 | rGrArG rGrCrU rArGrC rArGrU rUrCrA rArCrU rUrCrU rGrUG A | rUrCrA rCrArG rArArG rUrUrG rArArC rUrGrC rUrArG rCrCrU rCrUrG |
| Pten-3 | rArGrC rUrArA rArGrG rUrGrA rArGrA rUrArU rArUrU rCrCT C | rGrArG rGrArA rUrArU rArUrC rUrUrC rArCrC rUrUrU rArGrC rUrGrG |
| Pten-4 | rGrGrG rArCrG rGrArC rUrGrG rUrGrU rArArU rGrArU rUrUG T | rArCrA rArArU rCrArU rUrArC rArCrC rArGrU rCrCrG rUrCrC rCrUrU |
| Pten-5 | rCrCrC rArCrC rArCrA rGrCrU rArGrA rArCrU rUrArU rCrAA A | rUrUrU rGrArU rArArG rUrUrC rUrArG rCrUrG rUrGrG rUrGrG rGrUrU |
| Pten-6 | rGrGrG rUrArA rArUrA rCrGrU rUrCrU rUrCrA rUrArC rCrAG G | rCrCrU rGrGrU rArUrG rArArG rArArC rGrUrA rUrUrU rArCrC rCrArA |
| Pten-7 | rCrArG rCrCrA rUrCrA rUrCrA rArArG rArGrA rUrCrG rUrUA G | rCrUrA rArCrG rArUrC rUrCrU rUrUrG rArUrG rArUrG rGrCrU rGrUrC |
| Pten-8 | rGrCrC rUrGrU rGrUrG rUrGrG rUrGrA rUrArU rCrArA rArGT A | rUrArC rUrUrU rGrArU rArUrC rArCrC rArCrA rCrArC rArGrG rCrArA |
| Pten-9 | rGrGrG rArUrU rUrCrC rUrGrC rArGrA rArArG rArCrU rUrGA A | rUrUrC rArArG rUrCrU rUrUrC rUrGrC rArGrG rArArA rUrCrC rCrArU |
| p16-A | rUrCrA rArGrA rCrArU rCrGrU rGrCrG rArUrA rUrUrU rGrCG T | rArCrG rCrArA rArUrA rUrCrG rCrArC rGrArU rGrUrC rUrUrG rArUrG |
| p16-B | rGrGrC rArArC rGrUrU rCrArC rGrUrA rGrCrA rGrCrU rCrUT C | rGrArA rGrArG rCrUrG rCrUrA rCrGrU rGrArA rCrGrU rUrGrC rCrCrA |
| p16-C | rCrArA rCrUrA rCrGrG rUrGrC rArGrA rUrUrC rGrArA rCrUG C | rGrCrA rGrUrU rCrGrA rArUrC rUrGrC rArCrC rGrUrA rGrUrU rGrArG |
| p16-D | rArCrG rGrGrC rArUrA rGrCrU rUrCrA rGrCrU rCrArA rGrCA C | rGrUrG rCrUrU rGrArG rCrUrG rArArG rCrUrA rUrGrC rCrCrG rUrCrG |
| p16-E | rCrUrA rCrCrU rUrCrU rCrCrC rGrCrC rCrGrG rUrGrC rArCG A | rUrCrG rUrGrC rArCrC rGrGrG rCrGrG rGrArG rArArG rGrUrA rGrUrG |
| p16-1 | rGrCrU rCrArA rCrUrA rCrGrG rUrGrC rArGrA rUrUrC rGrAA C | rGrUrU rCrGrA rArUrC rUrGrC rArCrC rGrUrA rGrUrU rGrArG rCrArG |
| p16-2 | rArGrG rCrUrA rGrArG rArGrG rArUrC rUrUrG rArGrA rArGA G | rCrUrC rUrUrC rUrCrA rArGrA rUrCrC rUrCrU rCrUrA rGrCrC rUrCrA |
| p16-3 | rGrCrA rGrGrU rUrCrU rUrGrG rUrCrA rCrUrG rUrGrA rGrGA T | rArUrC rCrUrC rArCrA rGrUrG rArCrC rArArG rArArC rCrUrG rCrGrA |
| p16-4 | rCrUrC rUrGrG rCrUrU rUrCrG rUrGrA rArCrA rUrGrU rUrGT T | rArArC rArArC rArUrG rUrUrC rArCrG rArArA rGrCrC rArGrA rGrCrG |
| p16-5 | rUrCrC rUrGrG rArCrC rArGrG rUrGrA rUrGrA rUrGrA rUrGG G | rCrCrC rArUrC rArUrC rArUrC rArCrC rUrGrG rUrCrC rArGrG rArUrU |
